# Supplementary material for: Escape behaviors in prey and the evolution of pennaceous plumage in dinosaurs
Source: PubMed Central journal article supplement (PMC10811223; doi:10.1038/s41598-023-50225-x), 2024-01-25
Supplement: 41598_2023_50225_MOESM1_ESM.pdf [file 41598_2023_50225_MOESM1_ESM.pdf]

1 **Supplementary information**

2  
3 **Escape behaviors in prey and the evolution of pennaceous plumage**  
4 **in dinosaurs**

5 **Authors:** Jinseok Park<sup>1</sup>, Minyoung Son<sup>2,3</sup>, Jeongyeol Park<sup>4</sup>, Sang Yun Bang<sup>1</sup>, Jungmoon Ha<sup>1</sup>,  
6 Hyungpil Moon<sup>4\*</sup>, Yuong-Nam Lee<sup>2\*</sup>, Sang-im Lee<sup>5\*</sup>, Piotr, G. Jablonski<sup>1,6\*</sup>

7  
8 <sup>1</sup> School of Biological Sciences, Seoul National University; Seoul, South Korea

9 <sup>2</sup> School of Earth and Environmental Sciences, Seoul National University; Seoul, South Korea

10 <sup>3</sup> Department of Earth and Environmental Sciences, University of Minnesota; Minneapolis,  
11 Minnesota, U.S.A.

12 <sup>4</sup> Department of Mechanical Engineering, Sungkyunkwan University; Suwon, South Korea

13 <sup>5</sup> Department of New Biology, DGIST; Daegu, South Korea

14 <sup>6</sup> Museum and Institute of Zoology, Polish Academy of Sciences, Warsaw, Poland

15

## Supplementary text

### Text S1

#### List of families marked in Figure S1 as “confirmed” (pink dots) and “suspected” (blue dots) visual flush-pursuers

Here we briefly describe the type of evidence available regarding flush-pursue foraging in these species and provide links to movie clips showing examples of their displays.

Visual flush-display foraging, which involves visual stimuli to make prey move/escape, is the most common, and we focus here only on this type. However, it has to be noted that some bird species in several families use non-visual flush strategies that work through tactile stimuli to make prey visible and available for attacks. Examples include the Scaly Thrush (*Zoothera dauma*<sup>1</sup>) and the Herring gull (*Larus argentatus*<sup>2</sup> cited in <sup>3</sup>).

It must be noted that the same or similar visual displays used in flush-display foraging may also serve as elements of antipredator reactions (e.g., as signals of vigilance) or in social interactions. To minimize the possibility of misclassifying these signals as flush-pursue displays, we critically evaluated the literature and **focused only on displays occurring exclusively during solitary foraging activities without the presence of other individuals (conspecifics or heterospecifics)**, as confirmed by video and audio in the clips. Additionally, we **excluded** situations in which birds might be felt **threatened** by predators, observers, or birdwatchers/videographers using predator calls or “pishing” sounds to attract the birds. Such situations can be recognized from the video and audio content by experienced field ornithologists who are attuned to various indicators for determining the context of the video, occasionally including other videos shot by the same person at the same location and time and also posted at the Macaulay library.

Also note that flush-pursuers use various foraging methods, including the flush-pursue strategy; no species rely exclusively on the flush-pursue strategy as their sole foraging strategy.

We list below all the families marked in Fig. S1. For some families, we do not have a clip with bird behavior, but we present relevant literature statements and results on which the classification is based. This list serves as an **overview of visual display behaviors during foraging**. A **complete phylogenetic analysis** of the evolutionary history of flush-displays will be addressed in a **separate paper**<sup>4</sup>. The numbers identifying the links to movie clips with examples of prey flush-displays refer to the numbers put on the schematic phylogeny in Fig. S1.

#### **Classification:**

**Confirmed flush-pursuers** (marked with \* in the list below and with pink dots in Fig. S1) are species with solid evidence linking visual displays to pursuing prey during foraging. If a family includes **at least one confirmed flush-pursuer**, it is also marked with an asterisk (\*; marked with pink dots in Fig. S1). In cases where a family contains multiple flush-pursuer species, only select examples are listed here. We include species for which the use of flush-pursue has been confirmed experimentally, as well as those for which only observational evidence exists.

**Suspected flush pursuers** (marked with ^ in the list below and with blue dots in Fig. S1) are actively foraging species (i.e., not sit-and-wait predators) with clear evidence for the use of displays during solitary foraging (excluding cases of possible communication among members of

62 a foraging group), but with weaker literature-based evidence for direct links between the display  
63 and pursuing prey, even though video evidence suggests the link may exist in the Macaulay  
64 library or on YouTube, and so on. All of these species perform **wing and/or tail displays** with  
65 various characteristics **in the absence of other individuals (conspecifics or heterospecifics)**  
66 **and in the context of foraging**, suggesting that the suspected function of flushing/disturbing  
67 prey. In some cases, other functions have also been suggested (e.g., signaling vigilance to  
68 predators), while the flush-pursue behavior was not clearly rejected (e.g., in Motacillidae).

69  
70 The list below includes only one to several species per family, and a **comprehensive review of**  
71 **all avian species** that employ the **flush-pursue foraging** strategy as one among several foraging  
72 strategies will be a subject of a **separate review paper**. Nevertheless, this brief list below clearly  
73 illustrates that many bird families contain species that use the flush-pursue foraging. The species  
74 are grouped by family, and the families are ordered counterclockwise on the circular  
75 representation of the phylogenetic tree in Fig. S1.

76  
77 Fifteen families are classified as containing “confirmed” flush pursuer(s), and another fifteen  
78 families are classified as containing “suspected” flush-pursuer(s). It is important to note that  
79 some of the suspected flush-pursuers may use behaviors like wing-flicking or other continuously  
80 repeated displays as signals of vigilance. This communication is less likely to be for interspecific  
81 communication because we attempted to include information about the behavior of solitary birds  
82 only. However, in some cases within the “suspected” category, there is clear evidence pointing to  
83 flush-pursue behavior. Even if we discard all information about “suspected” flush-pursuers, we  
84 still have 15 families with confirmed flush-pursuers. These families are distributed across  
85 different parts of the phylogenetic tree. The detailed reconstruction of ancestral states and  
86 evolutionary transitions between non-flush-pursue foraging styles and flush-pursue foraging will  
87 be addressed in our future research<sup>4</sup>.

#### 88 89 **List of families with confirmed (\*) and suspected (^) flush-pursuers:**

##### 90 91 **\*Pluvianidae**

##### 92 **\*Egyptian plover (*Pluvianus aegyptius*)**

93 From the Birds of the World species account's<sup>5</sup> section “Diet and foraging”: “*catching flying*  
94 *insects on the run (these sometimes flushed by bird running with wings slightly spread).*”

##### 95 96 **^Turnicidae**

##### 97 **^Black-breasted Buttonquail (*Turnix melanogaster*)**

98 From the Birds of the World species account's<sup>6</sup> section “Diet and foraging”: “*Sometimes shades*  
99 *litter with outstretched wings while scratching.*” Scratching refers to activity performed during  
100 solitary foraging. It potentially may indicate that visual stimulus from outstretched wings affects  
101 the prey, although it may also serve to increase the visibility of the prey in the shadow of the  
102 wings.

##### 103 104 **\*Cuculidae**

##### 105 **\*Greater roadrunner (*Geococcyx californianus*)**

106 From the Birds of the World species account's<sup>7</sup> section “Diet and foraging”: “*Frequently flashes*  
107 *white spots visible on open wings to startle or flush prey.*”

108 Link 1) <https://www.youtube.com/watch?v=qmXGDWkZSek>, © Kat Avila, uploaded on 4th  
109 October 2017; in this clip, the species uses relatively simple wing opening and closing  
110 movements during foraging.

111 \***Striped Cuckoo (*Tapera naevia*)** uses its alulae in flush-pursue foraging (<sup>8</sup> section “Diet and  
112 foraging”).

113 Link 2) <https://macaulaylibrary.org/asset/201222491>; the species uses alulae spreading and  
114 folding movements during foraging in these clips.

#### 115 ^**Eurypygidae**

##### 116 ^**Sunbittern (*Eurypyga helias*)**

117 Link 3) <https://macaulaylibrary.org/asset/ML201989021>; this clip shows the species using one  
118 wing as if to affect the behavior of prey, maybe by affecting the direction of the prey  
119 escape/move, which is followed by an attack. However, we cannot exclude the possibility that  
120 this asymmetric display’s function was to simply provide shadow to the area where the prey may  
121 be located.  
122

#### 123 ^**Trogonidae**

##### 124 ^**Malabar Trogon (*Harpactes fasciatus*)**

125 It has been described that this species uses a flush-pursue strategy to flush prey out from hiding  
126 places and then pursue the prey<sup>9</sup>.  
127

#### 128 ^**Acanthisittidae**

##### 129 ^**Rifleman (*Acanthisitta chloris*)**

130 From the Birds of the World species account’s<sup>10</sup> section “Diet and foraging”: “*Restless forager*  
131 *along trunks and branches; wings constantly flicked.*”  
132

#### 133 ^**Pittidae**

##### 134 ^**Ornate Pitta (*Pitta concinna*)**

135 Link 4) <https://macaulaylibrary.org/asset/201662871>; in this clip, the species spreads its wings  
136 during foraging and then apparently pounces on prey; it also uses wing-flicking As pittas are  
137 challenging to observe among the thick undergrowth of their natural habitats, no more evidence  
138 corroborating or rejecting the use of flush-pursue foraging in this taxon is available at the  
139 moment.  
140

#### 141 ^**Oxyruncidae**

##### 142 ^**Tawny-breasted Flycatcher (*Myiobius villosus*)**

143 From the Birds of the World species account’s<sup>11</sup> section “Diet and foraging”: “*droops wings,*  
144 *often pivots, uses flush-and-chase strategy.*”  
145

#### 146 ^**Tyrannidae**

##### 147 ^**Golden-faced Tyrannulet (*Zimmerius chrysops*)**

148 This species has been mentioned using the flush-pursue strategy<sup>12</sup>.

149 From the Birds of the World species account<sup>13</sup>: “*Actively hops, tail often cocked slightly above*  
150 *horizontal.*”  
151

#### 152 ^**Thamnophilidae**

154 \***Dot-winged Antwren (*Microrhophias quixensis*)**  
 155 This species has been confirmed to use flush-pursue foraging<sup>14</sup>.  
 156 Link 5) <https://macaulaylibrary.org/asset/200781261>; in this clip, the species flicks its wings  
 157 during foraging through the foliage.

158 \***Rufous-backed Stipplethroat (*Epinecrophylla haematonota*)**  
 159 This species has been confirmed using flush-pursue foraging<sup>14</sup>.  
 160

161 \***Furnariidae**

162 \***Plain-brown Woodcreeper (*Dendrocichla fuliginosa*)**  
 163 The flush-pursuing with wing-flashing displays behavior has been noted by observers<sup>15</sup>: “*Plain-*  
 164 *brown Woodcreepers frequently use wing-flashing when prey stops and is concealed. The bird*  
 165 *moves to the trunk where prey disappeared and briefly flashes one wing widely along the surface*  
 166 *of the trunk. On slender trunks the bird may simultaneously sidle and peer around the trunk from*  
 167 *the opposite direction, so that it will run into prey fleeing the wing.*”

168 \***White-chinned Woodcreeper (*Dendrocincla merula*)**  
 169 The flush-pursuing with wing-flashing displays behavior has been observed<sup>15</sup>: “*I recorded*  
 170 *successful wing-flashing to flush prey by a White-chinned Wood-creeper at Cashibococha,*  
 171 *Peru.*”

172 \***Tawny-winged Woodcreeper (*Dendrocincla anabatina*)**  
 173 As in the White-chinned woodcreeper, the flush-pursuing with wing-flashing displays behavior  
 174 has been noted<sup>15</sup>: “*Tawny-winged Woodcreepers flash the wings even more frequently than do*  
 175 *Plain-brown Woodcreepers. Perhaps the conspicuous tawny wing patches of the Tawnywing and*  
 176 *the yellow undersides of the wings of all three species are adaptations for flushing prey.*”  
 177

178 \***Rhipiduridae**

179 \***White-browed Fantail (*Rhipidura aureola*)**  
 180 From the Birds of the World species account’s<sup>16</sup> section “Diet and foraging”: “*Flushes prey by*  
 181 *restlessly twisting and turning along branches and tree trunks, flicking wings open and fanning*  
 182 *tail.*”  
 183 Link 6) <https://www.youtube.com/watch?v=ifxkGriCaXM> © Shirishkumar Patil, uploaded on  
 184 22nd April 2014; the species spreads its tail and flicks wings in this clip.

185 \***Willie-wagtail (*Rhipidura leucophrys*)**  
 186 From the Birds of the World species account’s<sup>17</sup> section “Diet and foraging”: “*Forages mostly*  
 187 *by flycatching, flush-pursuit and gleaning.*”  
 188 Link 7) <https://www.youtube.com/watch?v=6B0YdC1FxBE> © oceanbirds1, uploaded on 24th  
 189 July 2015; the species flush prey by fanning/wagging tail (sidewise), and flicking wings in this  
 190 clip.

191 ^**White-throated Fantail (*Rhipidura albicollis*)**  
 192 Link 8) <https://macaulaylibrary.org/asset/201032211>; the species shows tail fanning and wing  
 193 dropping during foraging in this clip.  
 194

195 \***Monarchidae**

196 \***Blue-headed Crested-Flycatcher (*Trochocercus nitens*)**  
 197 From the Birds of the World species account’s<sup>18</sup> section “Diet and foraging”: “*Moves actively,*  
 198 *with tail held fully fanned and wings spread and drooped. Rapidly beats wings, or stretches*

199 *wings wide and twists tail, to disturb prey; snaps up insects in air in short sally or circular*  
200 *descending flight.*”

201 **\*African Paradise-flycatcher (*Terpsiphone viridis*)**

202 The flush-pursuing with fan-fail displays behavior has been observed (<sup>19</sup> section “Diet and  
203 foraging”).

204  
205 **\*Stenostiridae**

206 **\*Yellow-bellied Fairy-fantail (*Chelidorhynch hypoxanthus*)**

207 From the Birds of the World species account’s<sup>20</sup> section “Diet and foraging”: “*Prey flushed by*  
208 *fluttering, and captured in aerobatic sallies.*”

209 **^African Blue Flycatcher (*Elminia longicauda*)**

210 From the Birds of the World species account’s<sup>21</sup> section “Diet and foraging”: “*Actively forages*  
211 *in canopy, with wings held half-drooped and tail continually spread.*”, in the manner similar to  
212 *Myioborus* redstarts in which this behavior has been experimentally proved to be used in flush-  
213 pursue foraging.

214 Link 9) <https://macaulaylibrary.org/asset/201957981>; in this clip, the species droops wings and  
215 spreads tail.

216  
217 **^Paridae**

218 **^Yellow-browed Tit (*Sylviparus modestus*)**

219 From the Birds of the World species account in the section’s<sup>22</sup> “Diet and foraging”: “*Restless,*  
220 *flits about through foliage; agile movements and behavior, including nervous wing-flicking,*  
221 *reminiscent of those of a leaf-warbler.*” Wing-flicking in leaf-warblers (Phylloscopidae) has  
222 been suggested to be linked with flush-pursue foraging.

223  
224 **\*Scotocercidae**

225 **\*Chestnut-capped Flycatcher (*Erythrocercus mccallii*)**

226 From the Birds of the World species account’s<sup>23</sup> section “Diet and foraging”: “*dislodges insects*  
227 *by flicking wings and making wide sweeps with tail spread; also makes short dashing flights in*  
228 *pursuit of insects.*”

229 Link 10) <https://macaulaylibrary.org/asset/201274401>; the species flicks wings, spreads tail, and  
230 pivots its body in this clip.

231  
232 **^Phylloscopidae**

233 Some species in this family flick wings during foraging nearly constantly, and it has been  
234 suggested<sup>24</sup>, however not fully proven, that this may flush prey that is subsequently pursued.  
235 While flush-pursuing is possible and has not been entirely rejected, the behavior and bright  
236 plumage colors in Phylloscopidae may be under strong selection for communication<sup>25</sup>. Examples  
237 of wing-flicking:

238 **^Common Chiffchaff (*Phylloscopus collybita*)**

239 From the Birds of the World species account’s<sup>26</sup> section “Diet and foraging”: “*Frequently dips*  
240 *tail when foraging.*”

241 Link 11) <https://macaulaylibrary.org/asset/201574941>; the species flicks its wings fast and  
242 moves its tail up and down vertically in this clip of a foraging individual.

243 **^Willow Warbler (*Phylloscopus trochilus*).**



244 Link 12) <https://macaulaylibrary.org/asset/201189341>; the species flicks its wings fast on the  
245 ground in this clip.

246

247 ^Pycnonotidae

248 ^Fischer's Greenbul (*Phyllastrephus fischeri*)

249 From the Birds of the World species account's<sup>27</sup> section "Diet and foraging": "*Flicks tail and*  
250 *wings*" during foraging.

251 ^Northern Brownbul (*Phyllastrephus strepitans*)

252 From the Birds of the World species account's<sup>28</sup> section "Diet and foraging": "*Flicks wings and*  
253 *tail constantly, both when foraging and when perched.*"

254

255 ^Acrocephalidae

256 ^Upcher's Warbler (*Hippolais languida*)

257 From the Birds of the World species account's<sup>29</sup> section "Diet and foraging": "*Waving tail to the*  
258 *sides, flicks wings rapidly while foraging, and sometimes stretches one wing straight out.*"

259

260 ^Cisticolidae

261 ^Chestnut-throated Apalis (*Apalis porphyrolaema*)

262 From the Birds of the World species account's<sup>30</sup> section "Diet and foraging": "*While foraging,*  
263 *often sways body from side to side, with wings held drooped, and tail erect and fanned, and*  
264 *flicked sideways, in manner of a monarch-flycatcher (Monarchidae), which family contains*  
265 *confirmed flush-pursuers.*"

266 ^Black-collared Apalis (*Oreolais pulcher*)

267 From the Birds of the World species account's<sup>31</sup> section "Diet and foraging": "*Has habit of*  
268 *extravagantly wagging its raised tail from side to side*" during foraging.

269 ^Cricket Longtail (*Spiloptila clamans*)

270 From the Birds of the World species account's<sup>32</sup> section "Diet and foraging": "*Tail continuously*  
271 *rotated and flirted*" during foraging.

272 ^Common Tailorbird (*Orthotomus sutorius*)

273 From the Birds of the World species account's<sup>33</sup> section "Diet and foraging": "*Hopping with tail*  
274 *held cocked and flicked from side to side*" during foraging.

275 Link 13) <https://macaulaylibrary.org/asset/201469261>; a foraging individual flicks its wings and  
276 hops with cocked tail in this clip.

277

278 ^Pnoepyidae

279 ^Scaly-breasted Cupwing (*Pnoepyga albiventer*)

280 From the Birds of the World species account's<sup>34</sup> section "Diet and foraging": "*Frequently flicks*  
281 *its wings while foraging.*"

282 Link 14) <https://macaulaylibrary.org/asset/339321481>; a solitary foraging individual actively  
283 flicks its wings in this clip.

284

285 ^Timaliidae

286 ^Golden Babbler (*Cyanoderma chrysaeum*)

287 Link 15) <https://macaulaylibrary.org/asset/201405711>

288 Link 16) <https://macaulaylibrary.org/asset/201976161>; the species actively moves and flicks its  
289 wings in these clips of solitary foraging birds.

290  
291  
292  
293  
294  
295  
296  
297  
298  
299  
300  
301  
302  
303  
304  
305  
306  
307  
308  
309  
310  
311  
312  
313  
314  
315  
316  
317  
318  
319  
320  
321  
322  
323  
324  
325  
326  
327  
328  
329  
330  
331  
332  
333  
334

**\*Sittidae**

**\*Velvet-fronted Nuthatch (*Sitta frontalis*)**

From the Birds of the World species account's<sup>35</sup> section "Diet and foraging": "*Vigorous wing-flapping observed, apparently an attempt to flush insects from face of tree trunks.*"

Link 17) <https://macaulaylibrary.org/asset/426344141>, the species spreads its wings and rapidly folds it in this clip.

**^Poliotilidae**

**^Blue-grey Gnatcatcher (*Poliotila caerulea*)**

From the Birds of the World species account's<sup>36</sup> section "Diet and foraging": "*Moves tail constantly, which may flush unseen prey.*"

Link 18) <https://macaulaylibrary.org/asset/330549521>; the species swings and rapidly moves its tail in the vertical axis in this clip.

**^Tichodromidae**

**^Wallcreeper (*Tichodroma muraria*)**

Link 19) <https://macaulaylibrary.org/asset/723326>; the species spreads and folds its wings fast on the rock during foraging for prey that seems to be pecked from the substrate suggesting a possible role of flicking in revealing prey's presence to the bird, however, the suggested function of flicking in professional literature, based on observations only, is "signaling" in this clip.

**\*Mimidae**

**\*Northern mockingbird (*Mimus polyglottos*)**

Its flush-display consists of stereotypically performed hitches and pauses<sup>37</sup>.

Link 20) <https://www.youtube.com/watch?v=boZz0ECyYEQ> © Linzy's Vids, uploaded on 17th October 2016.

**^Muscicapidae**

**^Rufous-tailed scrub robin (*Cercotrichas galactotes*)**

Link 21) <https://macaulaylibrary.org/asset/200888551>; the species uses its wings and tail movements simultaneously during foraging in these clips.

**^Black Scrub-Robin (*Cercotrichas podobe*)**

Link 22) <https://macaulaylibrary.org/asset/215171291>; the species moves on the ground while spreading its tail and wings. It uses wings and tail separately and sometimes uses both in this clip.

**^Motacillidae**

**^Gray Wagtail (*Motacilla cinerea*)**

Link 23) <https://macaulaylibrary.org/asset/201514801>; the species wags its tail while foraging in this clip. Flushing prey was not rejected as a possible function of wagging, but it may be a signal of vigilance against predators<sup>38</sup>.

**\*Thraupidae**

**\*Guira Tanager (*Hemithraupis guira*)**



335 This species uses the flush-pursue strategy<sup>12</sup>. But there is no detailed description of the display  
336 characteristics.

337

338 **\*Parulidae**

339 **\*Slate-throated Redstart (*Myioborus miniatus*)** hops and pivots its body through foliage white  
340 spreading its tail and wings<sup>39</sup>.

341 Link 24) <https://macaulaylibrary.org/asset/201955691>; the species spreads its wings and tail,  
342 combined with body pivoting in this clip.

343 **\*Painted Redstart (*Myioborus pictus*)** uses tail and wing spreading and also body movements  
344 (e.g., pivoting) during foraging<sup>40-42</sup>.

345 Link 25) <https://macaulaylibrary.org/asset/464937>; the species spreads its wings and tail,  
346 combined with body pivoting and hopping in this clip.

347 **\*Collared Redstart (*Myioborus torquatus*)**

348 From the Birds of the World species account<sup>43</sup>: “*sometimes advancing through foliage or along*  
349 *branches with the wings drooped and the tail fanned, exposing the white outer rectrices; it*  
350 *pursues small insects that are flushed by its approach.*”

351 Link 26) <https://macaulaylibrary.org/asset/201828251>; the species spreads its wings and tail in  
352 this clip.

353

354

Supplementary figures

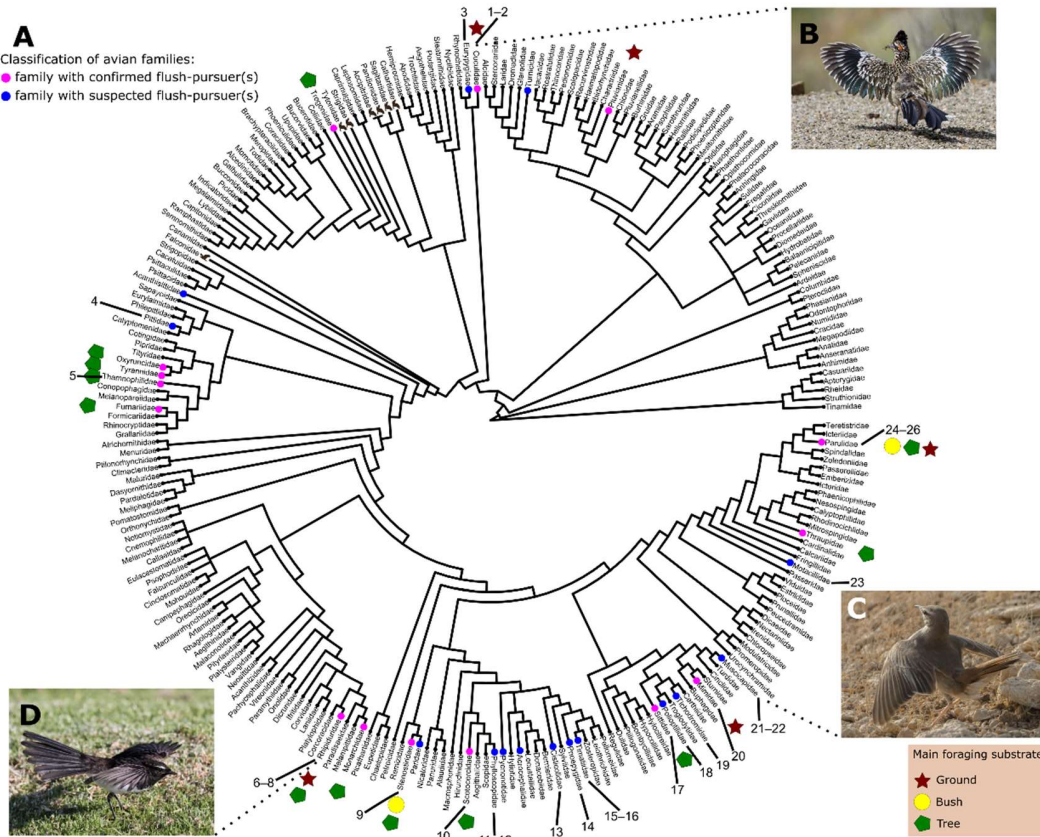

357  
358  
359  
360  
361  
362  
363  
364  
365  
366  
367  
368  
369  
370  
371  
372  
373  
374  
375  
376

**Figure S1. Diversity of extant avian flush-pursuers.** (A) Distribution of flush-pursuers among 248 avian families across diverse avian taxa. Pink dots indicate families containing at least one species with evidence of using flush-pursue foraging and classified as “confirmed” flush-pursuers (Text S1). Blue dots indicate additional families containing at least one “suspected” flush-pursuer (Text S1) defined as actively foraging species (i.e., not sit-and-wait predator) with evidence of using displays during foraging movements but with weaker evidence for direct links between the display and pursuing of flushed prey (albeit video evidence suggesting this link may exist). The symbols of the brown star, yellow circle, and green pentagon denote the main foraging substrate of confirmed flush-pursuers within a family, with each symbol indicating species that primarily forage on the ground, in bushes, and in trees, respectively. The bird-symbol at the tip of the phylogeny indicates families of predatory birds, including hawks, eagles, vultures, owls, and falcons. This consensus tree was built using a tree set obtained from BirdTree.org. (B–D) Photos illustrating examples of displays of ground-foraging flush-pursuers: Greater Roadrunner (*Geococcyx californianus*), Rufous-tailed Scrub-Robin (*Cercotrichas galactotes*), Willie-wagtail (*Rhipidura leucophrys*). We used the following recordings from the Macaulay Library at the Cornell Lab of Ornithology: ML98307051, ML366333971, ML205494131. This figure concerns Fig. 1G. The numbers next to each family correspond to the numbers given to the video links listed in Text S1. A comprehensive review of flush-pursuing birds will be the subject of a separate review paper<sup>4</sup>.

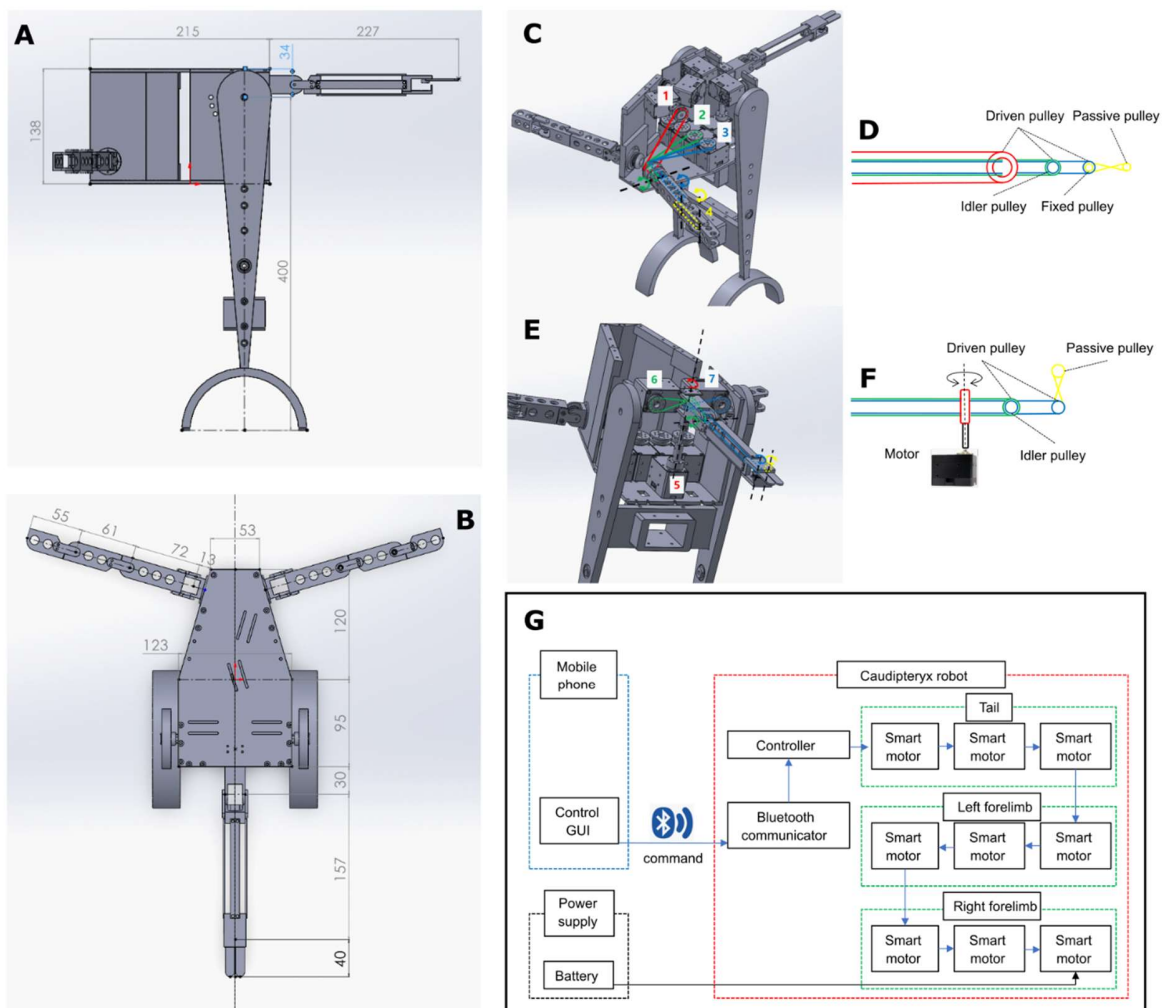

**Figure S2. Hardware and control system of the *Caudipteryx* robot (Robopteryx).** (A) Side view of the CAD model used for building Robopteryx. (B) Top view of the CAD model used for building Robopteryx. The unit length is in mm. (C and D) For forelimb motion control, two fishing lines (thickness: 0.47 mm, tensile strength: 45 kg) and a belt connected to a motor (XM430-W210-R, Robotis) are used as tendons to control pitch (green), yaw (blue), and roll (red) rotations. The fishing line (blue) connected with motor no.3 also implements rotating at the elbow joint. An additional fishing line (yellow) is used for passive rotation of the wrist. (E and F) Tail motion is controlled using a motor (no.6) with a fishing line (green) for pitch motion. We also implement yaw rotation (motor no.5) and spreading of the tail tip (blue) in the robot. (G) The schematic diagram of the robot control system. The controller (OpenCM9.04-C, Robotis) receives operation commands created from a mobile phone through the Bluetooth communicator (BT-410, Robotis). The controller is connected to a series of smart motors. An external battery (LIPO Battery LB-020, Robotis) supplies power.

377  
 378  
 379  
 380  
 381  
 382  
 383  
 384  
 385  
 386  
 387  
 388  
 389  
 390  
 391  
 392

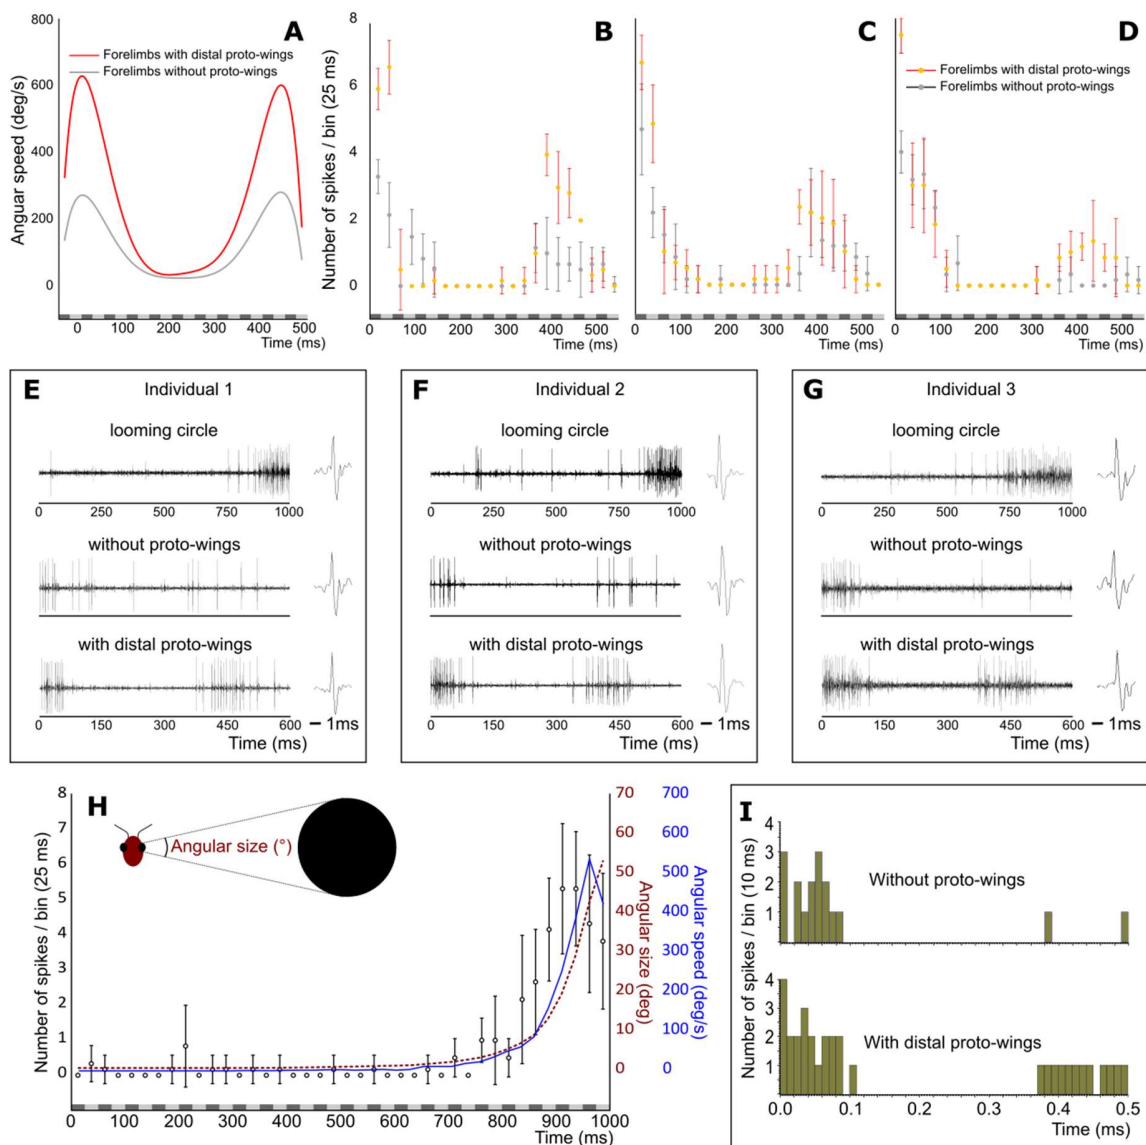

393  
 394 **Figure S3. Additional results of neurophysiological experiments.** (A) Angular speed  
 395 calculated from the forelimb tips' movements in the *Caudipteryx* animations (Video S1, parts 4  
 396 and 5). (B–D) The firing rate (no. of spikes/25 ms bin; average  $\pm$  SD) of the looming-sensitive  
 397 escape pathway from each of three individuals in response to the animations of forelimb display  
 398 without (gray bar;  $n = 6$ ) and with (red bar;  $n = 6$ ) distal proto-wings. All records from three  
 399 individuals are used in Fig. 1G. Bins are marked as gray bars along the horizontal axis. (E–G)  
 400 Examples of recordings from the grasshopper' LGMD/DCMD looming-detective pathway from  
 401 each of three individuals in response to animations: a looming circle; forelimb movement  
 402 without proto-wings; forelimb movement with proto-wings. A spike next to a recording is an  
 403 example from that recording. Spike shapes slightly differed between individual grasshoppers  
 404 (especially in terms of the amplitude of the lower and upper part of the spike), but the spike  
 405 shapes were similar between the looming circle and the animations of flush displays within the  
 406 same individual grasshopper. A comprehensive study of the neurophysiological responses to a  
 407 full variety of hypothetical displays by flush-pursuing dinosaurs will be the subject of a separate

408 paper. The spike data are shown in Tables S5 and S6. **(H)** The firing rate in response to a  
409 looming circle. The firing rate (no. of spikes/25 ms bin; average  $\pm$  SD) of the grasshopper  
410 looming-sensitive escape pathway in response to a looming circle animation [n = 6 (2 recordings  
411 from each of three individuals)]. The approaching speed was 6 m/s. The right-side Y-axis shows  
412 the stimulus angular size (deg; dotted burgundy line) and speed (deg/s; solid blue line) of the  
413 looming circle. Bins are marked as gray bars along the horizontal axis. The spike data are shown  
414 in Table S9. **(I)** Examples of the firing rate of the escape pathway analyzed with a bin size of 10  
415 ms to show that even with a short bin size, the peak value of spiking frequency occurs right at the  
416 outset of the flush display animation. The remaining analyses were conducted using a bin size of  
417 25 ms to decrease random variation among bins.  
418



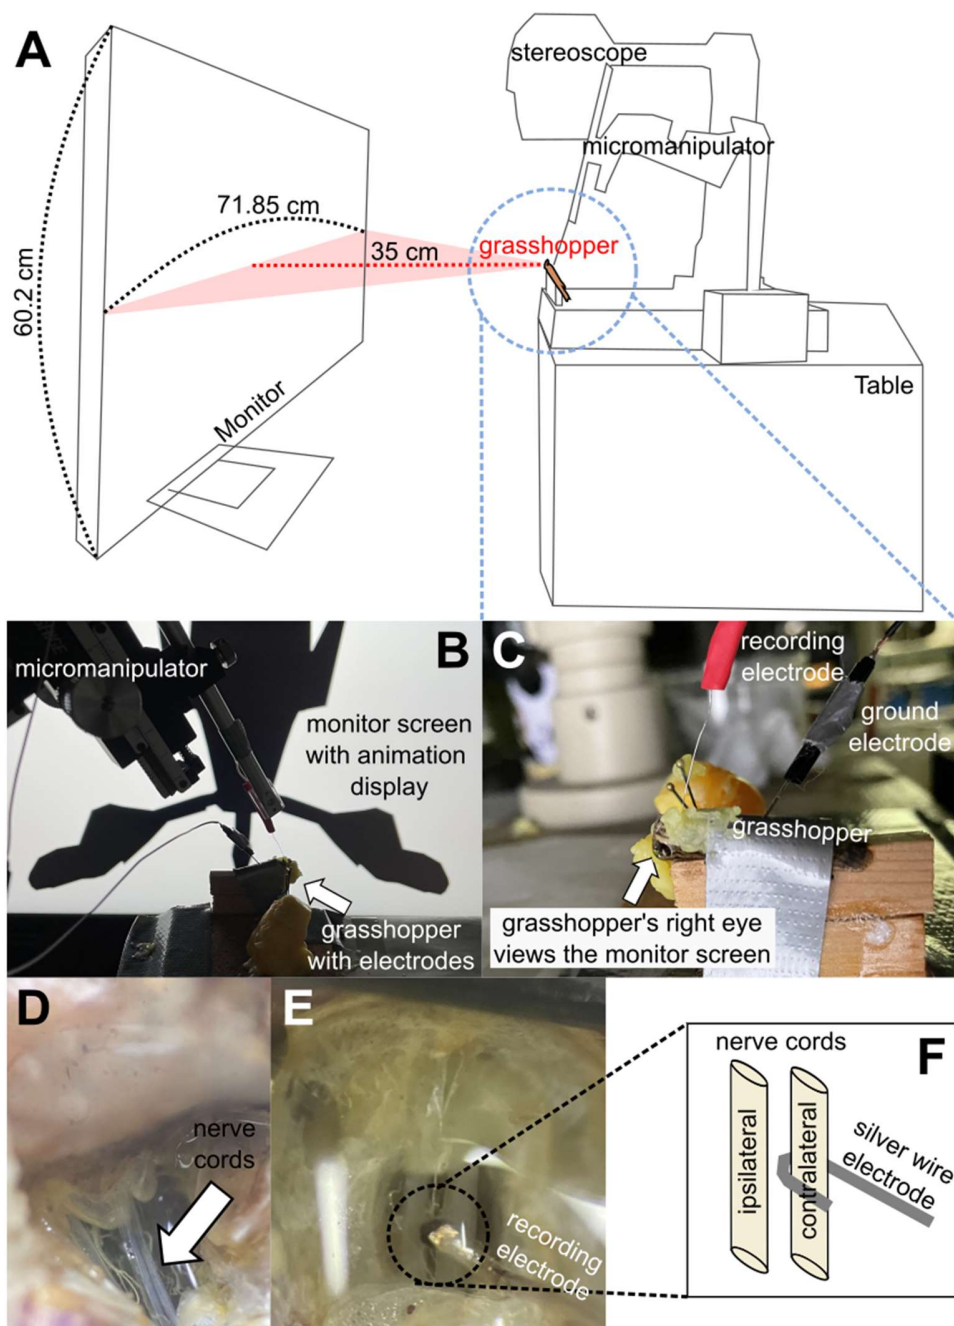

419  
 420 **Figure S4. Experimental setup for neurophysiological experiments.** (A) A schematic view of  
 421 the experimental setup for neurophysiological experiments. A grasshopper and equipment are  
 422 placed on a table. The distance between the monitor and the grasshopper's right eye is set to 35  
 423 cm. (B) *Caudipteryx* animation is displayed on the monitor. (C) The silver wire hook-electrode  
 424 (red, serving as the recording electrode) is wrapped around the contralateral ventral nerve cord,  
 425 and a pin (black, acting as the ground electrode) is inserted into the grasshopper's abdomen,  
 426 connecting to the ground. (D) An arrow indicates the ventral nerve cords of the grasshopper. (E  
 427 and F) A dotted circle indicates the point of the ventral nerve cord where the electrode is hooked  
 428 to the contralateral nerve cord.



429  
430  
431  
432  
433  
434  
435  
436  
437  
438  
439  
440  
441

**Supplementary tables**

**Table S1. Results of experiment 1.** The effect of the robot’s motor sound (Treatment 1-1) and the presence of proto-wings (Treatment 1-3 vs. 1-2) on escape distance and frequency by grasshoppers during a step-wise approach of the robot starting from 100 cm with maximally up to five stops with flush displays at 100, 80, 60, 40, and 20 cm to the grasshopper. The approach ended either at 20 cm or when the grasshopper escaped (details in Methods Part 4 Experiment 1; results in Fig. 2B). *P*-values for each pair of experimental conditions were (1-1) vs. (1-2) < 0.001, (1-1) vs. (1-3) < 0.0001, (1-2) vs. (1-3) < 0.0001 (Dunn’s test with Bonferroni correction). The number in parentheses indicates the number of grasshoppers tested with the displaying robot placed directly in front or behind them. Additional analysis of the data set, excluding these situations, showed similar results [Dunn’s test with Bonferroni correction, *P* for (1-1) vs. (1-2) < 0.001, (1-1) vs. (1-3) < 0.0001, (1-2) vs. (1-3) < 0.0001]. This table concerns Fig. 2B.

| Test distance | Experimental condition                                    |                                                               |                                                          |
|---------------|-----------------------------------------------------------|---------------------------------------------------------------|----------------------------------------------------------|
|               | Motor sound playback without movements<br>Treatment (1-1) | Flushing movements without the proto-wings<br>Treatment (1-2) | Flushing movement with the proto-wing<br>Treatment (1-3) |
| 100 cm        | 0                                                         | 0                                                             | 1                                                        |
| 80 cm         | 0                                                         | 1 (1)                                                         | 0                                                        |
| 60 cm         | 0                                                         | 0                                                             | 9 (2)                                                    |
| 40 cm         | 0                                                         | 9 (2)                                                         | 15 (2)                                                   |
| 20 cm         | 2 (1)                                                     | 10                                                            | 17 (8)                                                   |
| No response   | 44 (6)                                                    | 23 (7)                                                        | 3 (1)                                                    |
| Total         | 46 (7)                                                    | 43 (10)                                                       | 45 (13)                                                  |

442  
443

444 **Table S2. Results of experiment 2.** The number of grasshoppers that escaped at each test  
445 distance and the number of grasshoppers that did not respond to the experimental conditions,  
446 even at a distance of 35 cm. We presented the robot to the grasshoppers in three experimental  
447 conditions: (2-1) without proto-wings; (2-2) with proximally located proto-wings presented; (2-  
448 3) with distally located proto-wings. None of the grasshoppers responded to the robot's flushing  
449 movements at a distance of 70 cm. Therefore, we only used responses at 35 cm for statistical  
450 comparisons among the treatments. *P*-values for each pair of experimental conditions are (2-1)  
451 vs. (2-2) = 0.02, (2-1) vs. (2-3) < 0.0001, (2-2) vs. (2-3) < 0.0001 [Chi-square test with  
452 Bonferroni correction]. The number in parentheses indicates the number of grasshoppers tested  
453 with the displaying robot placed directly in front or behind them. Additional analysis of the data  
454 set, excluding these data points, showed similar results [Chi-square test with Bonferroni  
455 correction, *P* for (2-1) vs. (2-2) = 0.02, (2-1) vs. (2-3) < 0.0001, (2-2) vs. (2-3) < 0.001]. This  
456 table concerns Fig. 2C.

| Test distance | Experimental treatments           |                                         |                                       |
|---------------|-----------------------------------|-----------------------------------------|---------------------------------------|
|               | No proto-wings<br>Treatment (2-1) | Proximal proto-wings<br>Treatment (2-2) | Distal proto-wings<br>Treatment (2-3) |
| 70 cm         | 0                                 | 0                                       | 0                                     |
| 35 cm         | 1                                 | 10                                      | 27 (1)                                |
| No response   | 29 (2)                            | 20 (1)                                  | 3                                     |
| Total         | 30 (2)                            | 30 (1)                                  | 30 (1)                                |

457

458 **Table S3. Results of experiment 3.** The number of grasshoppers that escaped at each test  
 459 distance and the number of grasshoppers that did not respond in experimental conditions, even at  
 460 a distance of 40 cm. We presented the robot to the grasshoppers in two experimental treatments:  
 461 (3-1) plain black distal proto-wings; (3-2) white-patched distal proto-wings. None of the  
 462 grasshoppers responded to the robot's flushing movements at a distance of 60 cm. Therefore, we  
 463 used only responses at 40 cm for statistical comparisons among the treatments. *P*-value for (3-1)  
 464 vs. (3-2) < 0.01 (Chi-square test with Yates' continuity correction). The number in parentheses  
 465 indicates the number of grasshoppers tested with the displaying robot placed directly in front or  
 466 behind them. Additional analysis of the data set, excluding these points, showed similar results.  
 467 (Chi-square test with Yates' continuity correction, *P* < 0.001). This table concerns Fig. 2D.

| Test distance | Experimental treatments                           |                                                     |
|---------------|---------------------------------------------------|-----------------------------------------------------|
|               | Plain black distal proto-wings<br>Treatment (3-1) | White-patched distal proto-wings<br>Treatment (3-2) |
| 60 cm         | 0                                                 | 0                                                   |
| 40 cm         | 3 (1)                                             | 15 (1)                                              |
| No response   | 27                                                | 15 (4)                                              |
| Total         | 30 (1)                                            | 30 (5)                                              |

468

469 **Table S4. Results of experiment 4.** The number of grasshoppers that escaped at each test  
470 distance and the number of grasshoppers that did not respond to experimental treatments, even at  
471 a distance of 60 cm in experiment 4. We presented the robot to the grasshoppers in three  
472 experimental treatments: (4-1) without caudal plumage; (4-2) with caudal plumage of the size  
473 imitating *Caudipteryx* fossil; (4-3) with caudal plumage twice the area of (4-1). None of the  
474 grasshoppers responded to the robot's flushing movements at a distance of 80 cm. Therefore, we  
475 only used responses at 60 cm for statistical comparisons among the treatments. *P*-values for each  
476 pair of experimental conditions were (1-1) vs. (1-2) = 0.02, (1-1) vs. (1-3) < 0.0001, (1-2) vs. (1-  
477 3) < 0.01 (Dunn's test with Bonferroni correction). The number in parentheses indicates the  
478 number of grasshoppers tested with the displaying robot placed directly in front or behind them.  
479 Additional analysis of the data set, excluding these points, showed similar results [Dunn's test  
480 with Bonferroni correction, *P* for (4-1) vs. (4-2) = 0.03, (4-1) vs. (4-3) < 0.0001, (4-2) vs. (4-3) <  
481 0.01]. This table concerns Fig. 2E.

| Test distance | Experimental treatments                   |                                                |                                               |
|---------------|-------------------------------------------|------------------------------------------------|-----------------------------------------------|
|               | Without caudal plumage<br>Treatment (4-1) | Normal-sized caudal plumage<br>Treatment (4-2) | Twice-sized caudal plumage<br>Treatment (4-3) |
| 80 cm         | 0                                         | 3                                              | 11                                            |
| 60 cm         | 0                                         | 10                                             | 16                                            |
| No response   | 30 (2)                                    | 35 (1)                                         | 21                                            |
| Total         | 30 (2)                                    | 48 (1)                                         | 48                                            |

482

483  
 484  
 485  
 486  
 487

**Table S5. Data set collected in neurophysiological experiments: treatment “without proto-wings”.** The number of recorded DCMD spikes in response to the “without proto-wings” animation for three individuals. The spike numbers are summed up in every bin (25 ms). We recorded the neural response six times for each individual. This table concerns Figs. 2G and S3B–D.

| Bin order<br>(25 ms) | Individual 1                           |    |    |    |    |    | Individual 2                           |    |    |    |    |    | Individual 3                           |    |    |    |    |    |
|----------------------|----------------------------------------|----|----|----|----|----|----------------------------------------|----|----|----|----|----|----------------------------------------|----|----|----|----|----|
|                      | Record number in order of presentation |    |    |    |    |    | Record number in order of presentation |    |    |    |    |    | Record number in order of presentation |    |    |    |    |    |
|                      | R1                                     | R2 | R3 | R4 | R5 | R6 | R1                                     | R2 | R3 | R4 | R5 | R6 | R1                                     | R2 | R3 | R4 | R5 | R6 |
| 1                    | 4                                      | 3  | 4  | 3  | 3  | 3  | 6                                      | 5  | 6  | 5  | 3  | 3  | 4                                      | 5  | 4  | 4  | 4  | 3  |
| 2                    | 2                                      | 4  | 1  | 2  | 2  | 2  | 1                                      | 2  | 2  | 2  | 3  | 3  | 4                                      | 3  | 4  | 2  | 3  | 3  |
| 3                    | 0                                      | 0  | 0  | 0  | 0  | 0  | 3                                      | 2  | 1  | 1  | 1  | 1  | 5                                      | 3  | 4  | 3  | 3  | 2  |
| 4                    | 2                                      | 2  | 2  | 0  | 1  | 2  | 1                                      | 2  | 0  | 0  | 2  | 0  | 2                                      | 3  | 2  | 2  | 3  | 2  |
| 5                    | 2                                      | 0  | 0  | 1  | 1  | 1  | 0                                      | 0  | 1  | 0  | 0  | 0  | 0                                      | 0  | 1  | 1  | 0  | 0  |
| 6                    | 0                                      | 0  | 0  | 1  | 2  | 0  | 0                                      | 1  | 0  | 0  | 0  | 0  | 0                                      | 2  | 0  | 1  | 1  | 0  |
| 7                    | 0                                      | 0  | 0  | 0  | 0  | 0  | 0                                      | 0  | 0  | 0  | 0  | 0  | 0                                      | 0  | 0  | 0  | 0  | 0  |
| 8                    | 0                                      | 0  | 0  | 0  | 0  | 0  | 0                                      | 0  | 0  | 1  | 0  | 0  | 0                                      | 0  | 0  | 0  | 0  | 0  |
| 9                    | 0                                      | 0  | 0  | 0  | 0  | 0  | 0                                      | 0  | 0  | 0  | 0  | 0  | 0                                      | 0  | 0  | 0  | 0  | 0  |
| 10                   | 0                                      | 0  | 0  | 0  | 0  | 0  | 0                                      | 0  | 0  | 0  | 0  | 0  | 0                                      | 0  | 0  | 0  | 0  | 0  |
| 11                   | 0                                      | 0  | 0  | 0  | 0  | 0  | 0                                      | 0  | 0  | 0  | 0  | 0  | 0                                      | 0  | 0  | 0  | 0  | 0  |
| 12                   | 0                                      | 0  | 0  | 0  | 0  | 0  | 0                                      | 0  | 0  | 0  | 0  | 0  | 0                                      | 0  | 0  | 0  | 0  | 0  |
| 13                   | 0                                      | 0  | 0  | 0  | 0  | 0  | 0                                      | 0  | 0  | 0  | 0  | 0  | 0                                      | 0  | 1  | 0  | 0  | 0  |
| 14                   | 0                                      | 0  | 0  | 0  | 0  | 0  | 0                                      | 0  | 0  | 0  | 0  | 0  | 0                                      | 0  | 0  | 0  | 0  | 0  |
| 15                   | 2                                      | 1  | 2  | 1  | 1  | 0  | 1                                      | 0  | 0  | 1  | 0  | 0  | 0                                      | 1  | 0  | 0  | 0  | 0  |
| 16                   | 1                                      | 1  | 1  | 0  | 3  | 0  | 3                                      | 3  | 3  | 3  | 0  | 1  | 1                                      | 0  | 0  | 0  | 1  | 0  |
| 17                   | 1                                      | 2  | 1  | 0  | 0  | 0  | 1                                      | 2  | 1  | 1  | 2  | 1  | 0                                      | 0  | 0  | 0  | 0  | 0  |
| 18                   | 0                                      | 1  | 0  | 1  | 1  | 1  | 1                                      | 0  | 2  | 1  | 2  | 1  | 0                                      | 0  | 0  | 0  | 0  | 0  |
| 19                   | 0                                      | 0  | 1  | 0  | 2  | 0  | 1                                      | 2  | 1  | 0  | 1  | 2  | 0                                      | 0  | 0  | 0  | 0  | 0  |
| 20                   | 1                                      | 1  | 1  | 0  | 0  | 1  | 1                                      | 1  | 1  | 1  | 1  | 0  | 1                                      | 0  | 0  | 0  | 0  | 0  |
| 21                   | 1                                      | 1  | 1  | 1  | 0  | 0  | 0                                      | 1  | 1  | 0  | 0  | 0  | 0                                      | 1  | 0  | 0  | 0  | 1  |
| 22                   | 0                                      | 0  | 0  | 0  | 0  | 0  | 0                                      | 0  | 0  | 0  | 0  | 0  | 0                                      | 0  | 1  | 0  | 0  | 0  |

488

489  
490  
491  
492  
493

**Table S6. Data set collected in neurophysiological experiments: treatment “with proto-wings”.** The number of recorded DCMD spikes in response to the “with distal proto-wing” animation for three individuals. The spike numbers are summed up in every bin (25 ms). We recorded the neural response six times for each individual. This table concerns Figs. 2G and S3B–D.

| Bin order<br>(25 ms) | Individual 1                              |    |    |    |    |    | Individual 2                              |    |    |    |    |    | Individual 3                              |    |    |    |    |    |
|----------------------|-------------------------------------------|----|----|----|----|----|-------------------------------------------|----|----|----|----|----|-------------------------------------------|----|----|----|----|----|
|                      | Record number in order of<br>presentation |    |    |    |    |    | Record number in order of<br>presentation |    |    |    |    |    | Record number in order of<br>presentation |    |    |    |    |    |
|                      | R1                                        | R2 | R3 | R4 | R5 | R6 | R1                                        | R2 | R3 | R4 | R5 | R6 | R1                                        | R2 | R3 | R4 | R5 | R6 |
| 1                    | 7                                         | 6  | 5  | 6  | 6  | 6  | 8                                         | 7  | 6  | 6  | 7  | 6  | 8                                         | 8  | 8  | 7  | 7  | 7  |
| 2                    | 6                                         | 7  | 8  | 6  | 6  | 7  | 6                                         | 5  | 5  | 6  | 3  | 4  | 5                                         | 4  | 2  | 3  | 2  | 2  |
| 3                    | 3                                         | 0  | 0  | 0  | 0  | 0  | 3                                         | 1  | 2  | 0  | 0  | 0  | 4                                         | 5  | 3  | 3  | 2  | 1  |
| 4                    | 0                                         | 0  | 0  | 0  | 0  | 0  | 1                                         | 1  | 1  | 1  | 0  | 0  | 3                                         | 2  | 3  | 1  | 1  | 1  |
| 5                    | 0                                         | 0  | 0  | 0  | 0  | 0  | 0                                         | 1  | 1  | 0  | 1  | 0  | 1                                         | 0  | 1  | 1  | 0  | 0  |
| 6                    | 0                                         | 1  | 0  | 0  | 0  | 0  | 0                                         | 0  | 1  | 0  | 0  | 0  | 0                                         | 0  | 0  | 0  | 0  | 0  |
| 7                    | 0                                         | 0  | 0  | 0  | 0  | 0  | 0                                         | 0  | 0  | 0  | 0  | 0  | 0                                         | 0  | 0  | 0  | 0  | 0  |
| 8                    | 0                                         | 0  | 0  | 0  | 0  | 0  | 0                                         | 0  | 0  | 0  | 0  | 0  | 0                                         | 0  | 0  | 0  | 0  | 0  |
| 9                    | 0                                         | 0  | 0  | 0  | 0  | 0  | 0                                         | 0  | 0  | 0  | 0  | 0  | 0                                         | 0  | 0  | 0  | 0  | 0  |
| 10                   | 0                                         | 0  | 0  | 0  | 0  | 0  | 0                                         | 0  | 0  | 0  | 0  | 0  | 0                                         | 0  | 0  | 0  | 0  | 0  |
| 11                   | 0                                         | 0  | 0  | 0  | 0  | 0  | 0                                         | 0  | 0  | 0  | 0  | 1  | 0                                         | 0  | 0  | 0  | 0  | 0  |
| 12                   | 0                                         | 1  | 0  | 0  | 0  | 0  | 0                                         | 1  | 0  | 0  | 0  | 0  | 0                                         | 0  | 0  | 0  | 0  | 0  |
| 13                   | 0                                         | 0  | 0  | 0  | 0  | 0  | 0                                         | 0  | 0  | 0  | 0  | 1  | 0                                         | 0  | 0  | 0  | 0  | 1  |
| 14                   | 0                                         | 0  | 0  | 0  | 1  | 0  | 1                                         | 0  | 0  | 0  | 1  | 1  | 0                                         | 0  | 0  | 0  | 0  | 0  |
| 15                   | 1                                         | 0  | 1  | 2  | 2  | 0  | 2                                         | 2  | 2  | 3  | 3  | 2  | 1                                         | 1  | 1  | 0  | 1  | 1  |
| 16                   | 4                                         | 3  | 4  | 4  | 4  | 5  | 2                                         | 2  | 4  | 1  | 2  | 2  | 2                                         | 1  | 0  | 1  | 1  | 1  |
| 17                   | 3                                         | 3  | 3  | 2  | 5  | 2  | 4                                         | 3  | 1  | 2  | 0  | 2  | 2                                         | 1  | 1  | 1  | 1  | 1  |
| 18                   | 2                                         | 3  | 3  | 3  | 2  | 4  | 3                                         | 1  | 3  | 3  | 1  | 0  | 3                                         | 2  | 0  | 1  | 2  | 0  |
| 19                   | 2                                         | 2  | 2  | 2  | 2  | 2  | 3                                         | 1  | 1  | 0  | 1  | 0  | 1                                         | 1  | 1  | 1  | 1  | 0  |
| 20                   | 0                                         | 0  | 0  | 1  | 0  | 1  | 0                                         | 1  | 0  | 0  | 0  | 0  | 3                                         | 0  | 1  | 0  | 1  | 0  |
| 21                   | 1                                         | 1  | 0  | 0  | 1  | 0  | 0                                         | 0  | 0  | 0  | 0  | 0  | 0                                         | 0  | 0  | 0  | 0  | 0  |
| 22                   | 0                                         | 0  | 0  | 0  | 0  | 0  | 0                                         | 0  | 0  | 0  | 0  | 0  | 0                                         | 0  | 0  | 0  | 0  | 0  |

494



495  
496  
497  
498

**Table S7. Linear model for explaining variations in the size of two peaks in DCMD firing rate.** The model includes two fixed effects: treatment (proto-wings presence vs. absence) and individual ID (with three levels). The values in the table represent the effect estimate for each variable, standard error, t-value, and p-value.

| Peak type   | Coefficients                   | Estimate | Standard Error | t-value | p-value  |
|-------------|--------------------------------|----------|----------------|---------|----------|
| Frist peak  | Intercept                      | 6.6111   | 0.2940         | 22.489  | < 2E-16  |
|             | Treatment, proto-wings absence | -2.8899  | 0.2940         | -9.827  | 3.47E-11 |
|             | Individual ID, number 2        | 0.6667   | 0.3600         | 1.852   | 0.0733   |
|             | Individual ID, number 3        | 0.5000   | 0.3600         | 1.389   | 0.1745   |
| Second peak | Intercept                      | 3.6389   | 0.2715         | 13.405  | 1.12E-14 |
|             | Treatment, proto-wings absence | -1.2778  | 0.2715         | -4.707  | 4.65E-05 |
|             | Individual ID, number 2        | -0.1667  | 0.3325         | -0.501  | 0.62     |
|             | Individual ID, number 3        | -1.7500  | 0.3325         | -5.264  | 9.23E-06 |

499  
500

501  
502  
503  
504

**Table S8. Estimated angular ranges (min value – max value) of possible movements of *Caudipteryx*'s forelimb.** The ranges were inferred from the nearest species [more primitive (*Acrocanthosaurus*) and advanced species (*Bambiraptor*)]. Details are described in Methods part 3. This table concerns Fig. 3G.

| Angle        | Theropod species                                            |                                                       |                                                                                                                                                        |
|--------------|-------------------------------------------------------------|-------------------------------------------------------|--------------------------------------------------------------------------------------------------------------------------------------------------------|
|              | Primitive species:<br><i>Acrocanthosaurus</i> <sup>44</sup> | Advanced species:<br><i>Bambiraptor</i> <sup>45</sup> | <b>Hypothetical ranges in <i>Caudipteryx</i> [range of possible minimal value] ~ [range of possible maximal value]</b>                                 |
| Shoulder (S) | -19° – 144°                                                 | 2° – 123°                                             | <b>-19°~2° – 114°~123°</b><br>= <i>Acrocanthosaurus</i> ~ <i>Bambiraptor</i> –<br><i>Acrocanthosaurus</i> ~ <i>Bambiraptor</i>                         |
| Elbow (E)    | 104° – 159°                                                 | 55~59° – 127~136°                                     | <b>55° – 136°</b><br>= <i>Bambiraptor</i><br>Maybe it could fold up to 30° <sup>46</sup>                                                               |
| Wrist (W)    | ?                                                           | 104° – 167°                                           | <b>0° – ~180°</b><br>= can fold like current birds –<br>cannot be fully unfolded due to its joint structure, < 180°                                    |
| Lifting (L)  | ?                                                           | ~88°                                                  | <b>? – 88°</b><br>= maximum value in <i>Bambiraptor</i><br><i>Caudipterix</i> group could not raise the arm horizontally due<br>to its joint structure |

505  
506

507 **Table S9. Response of the LGMD/DCMD pathway to an animation of a simple looming**  
508 **stimulus.** The number of recorded DCMD spikes in response to the “looming circle” animation  
509 for three individuals. The spike numbers are summed up in every bin (25 ms). We recorded the  
510 neural response two times for each individual, both at the beginning and at the end of the  
511 recording session. This table concerns Fig S3H.

| Bin order<br>(25 ms) | Individual 1  |    | Individual 2  |    | Individual 3  |    |
|----------------------|---------------|----|---------------|----|---------------|----|
|                      | Record number |    | Record number |    | Record number |    |
|                      | R1            | R2 | R1            | R2 | R1            | R2 |
| 1                    | 0             | 0  | 0             | 0  | 0             | 0  |
| 2                    | 1             | 1  | 0             | 0  | 0             | 0  |
| 3                    | 0             | 0  | 0             | 0  | 1             | 0  |
| 4                    | 0             | 0  | 0             | 0  | 0             | 0  |
| 5                    | 0             | 0  | 0             | 0  | 0             | 0  |
| 6                    | 0             | 0  | 0             | 0  | 0             | 0  |
| 7                    | 0             | 0  | 0             | 0  | 0             | 0  |
| 8                    | 0             | 0  | 1             | 0  | 0             | 0  |
| 9                    | 0             | 0  | 3             | 0  | 1             | 1  |
| 10                   | 0             | 0  | 0             | 0  | 0             | 0  |
| 11                   | 0             | 0  | 0             | 0  | 0             | 1  |
| 12                   | 0             | 0  | 0             | 0  | 0             | 1  |
| 13                   | 0             | 0  | 0             | 0  | 0             | 0  |
| 14                   | 0             | 0  | 0             | 0  | 0             | 1  |
| 15                   | 0             | 0  | 0             | 0  | 0             | 0  |
| 16                   | 0             | 0  | 1             | 0  | 0             | 0  |
| 17                   | 0             | 0  | 0             | 0  | 0             | 0  |
| 18                   | 0             | 0  | 0             | 0  | 0             | 0  |
| 19                   | 0             | 0  | 0             | 0  | 0             | 0  |
| 20                   | 0             | 0  | 1             | 0  | 0             | 0  |
| 21                   | 0             | 0  | 0             | 0  | 0             | 0  |
| 22                   | 0             | 0  | 0             | 0  | 0             | 0  |
| 23                   | 0             | 0  | 0             | 0  | 0             | 1  |
| 24                   | 0             | 0  | 0             | 0  | 0             | 0  |
| 25                   | 0             | 0  | 0             | 0  | 0             | 0  |
| 26                   | 0             | 0  | 0             | 0  | 0             | 0  |
| 27                   | 0             | 0  | 0             | 0  | 1             | 0  |
| 28                   | 0             | 0  | 0             | 0  | 0             | 0  |
| 29                   | 0             | 0  | 1             | 0  | 1             | 1  |
| 30                   | 0             | 0  | 0             | 0  | 0             | 0  |
| 31                   | 1             | 2  | 1             | 0  | 1             | 1  |
| 32                   | 2             | 0  | 0             | 0  | 3             | 1  |
| 33                   | 0             | 1  | 0             | 0  | 1             | 1  |
| 34                   | 1             | 1  | 1             | 1  | 5             | 4  |
| 35                   | 3             | 2  | 3             | 0  | 4             | 4  |
| 36                   | 3             | 5  | 4             | 2  | 5             | 6  |
| 37                   | 5             | 5  | 6             | 2  | 7             | 7  |
| 38                   | 7             | 6  | 5             | 4  | 3             | 7  |
| 39                   | 6             | 3  | 5             | 1  | 5             | 6  |
| 40                   | 5             | 1  | 5             | 2  | 4             | 6  |

512  
513

514 **Captions for supplementary video**

515

516 **Video S1.**

517 It consists of 7 parts:

518

519 **Part 1. Grasshopper's escape in response to the robot's forelimb expansion.**

520 High-speed video (960 fps) showing a grasshopper's escape behavior in response to the flush-  
521 display by the robot. The escape happens during the forelimbs' spreading stage of the flush-  
522 display movement. The white arrow indicates the grasshopper's location before the jump.

523

524 **Part 2. Grasshopper's escape in response to the robot's forelimb folding movement.**

525 High-speed video (960 fps) showing a grasshopper's escape behavior in response to the flush-  
526 display by the robot. The escape happens during the forelimb's folding stage of the flush-display  
527 movement. The white indicates the grasshopper's location before the jump.

528

529 **Part 3. Grasshopper's escape in response to the robot's tail movement.**

530 High-speed video (960 fps) showing a grasshopper's escape behavior in response to the robot's  
531 tail-upward movement. The white arrow indicates the grasshopper's location before the jump.

532

533 **Part 4. Computer animation of the forelimb movement with proto-wings.**

534

535 **Part 5. Computer animation of the forelimb movement without proto-wings.**

536

537 **Part 6. Slow-motion movie of the robot's forelimb movement.**

538 High-speed video (960 fps) of the robot's forelimb movements, starting from the resting position  
539 and ending with the positions of the maximal values of the joint angles (as defined in Fig. 3G).  
540 The flickering in the video is caused by artificial light pulsating at 60 Hz.

541

542 **Part 7. Looming circle stimulus used in the neurophysiological experiments.**

543

544

## References cited in supplementary material

545

546

547

548

549

550

551

552

553

554

555

556

557

558

559

560

561

562

563

564

565

566

567

568

569

570

571

572

573

574

575

576

577

578

579

580

581

582

583

584

585

586

587

588

589

1. Collar, N., Christie, D. A., Kirwan, G. M. & del Hoyo, J. Scaly Thrush (*Zoothera dauma*), version 1.0. In Birds of the World (S. M. Billerman, B. K. Keeney, P. G. Rodewald, and T. S. Schulenberg, Editors). Cornell Lab Ornithol. Ithaca, NY, USA. *Cornell Lab of Ornithology, Ithaca, NY, USA* (2020) doi:<https://doi.org/10.2173/bow.scathr8.01>.
2. Tinbergen, N. *The herring gull's world*. (New York: Basic Books, Inc., 1960).
3. Catania, K. C. Worm grunting, fiddling, and charming - Humans unknowingly mimic a predator to harvest bait. *PLoS One* **3**, (2008).
4. Park, J., Lee, S. & Jablonski, P. G. Unpublished data.
5. Maclean, G. L. & Kirwan, G. M. Egyptian Plover (*Pluvianus aegyptius*), version 1.0. In Birds of the World (J. del Hoyo, A. Elliott, J. Sargatal, D. A. Christie, and E. de Juana, Editors). *Cornell Lab of Ornithology, Ithaca, NY, USA* (2020) doi:[10.2173/bow.egypl1.01](https://doi.org/10.2173/bow.egypl1.01).
6. Debus, S. & Kirwan, G. M. Black-breasted Buttonquail (*Turnix melanogaster*), version 1.0. In Birds of the World (J. del Hoyo, A. Elliott, J. Sargatal, D. A. Christie, and E. de Juana, Editors). *Cornell Lab of Ornithology, Ithaca, NY, USA* (2020) doi:[10.2173/bow.blbbut2.01](https://doi.org/10.2173/bow.blbbut2.01).
7. Hughes, J. M. Greater Roadrunner (*Geococcyx californianus*), version 1.0. In Birds of the World (A. F. Poole, Editor). *Cornell Lab of Ornithology, Ithaca, NY, USA* (2020) doi:[10.2173/bow.greroa.01](https://doi.org/10.2173/bow.greroa.01).
8. Maxon, M. A. *The real roadrunner*. (University of Oklahoma Press, 2005).
9. Varghese, A. P. Ecology and behaviour of Malabar Trogon *Harpactes fasciatus Malabaricus*. (Mahatma Gandhi University, 2002).
10. Gill, B. No Title Rifleman (*Acanthisitta chloris*), version 1.0. In Birds of the World (J. del Hoyo, A. Elliott, J. Sargatal, D. A. Christie, and E. de Juana, Editors). *Cornell Lab of Ornithology, Ithaca, NY, USA* (2020) doi:[10.2173/bow.riflem1.01](https://doi.org/10.2173/bow.riflem1.01).
11. Farnsworth, A. & Lebbin, D. J. Tawny-breasted Flycatcher (*Myiobius villosus*), version 1.0. In Birds of the World (J. del Hoyo, A. Elliott, J. Sargatal, D. A. Christie, and E. de Juana, Editors). *Cornell Lab of Ornithology, Ithaca, NY, USA* (2020) doi:[10.2173/bow.tabfly1.01](https://doi.org/10.2173/bow.tabfly1.01).
12. Munoz Z., J. & Colorado Z., G. J. Importance of tropical mixed-species flocks for migratory birds in shade-grown coffee: implications of foraging together. *J. F. Ornithol.* **92**, 212–230 (2021).
13. Fitzpatrick, J. W., Christie, D. A., Juana, E. de & Kirwan, G. M. Golden-faced Tyrannulet (*Zimmerius chrysops*), version 1.0. In Birds of the World (J. del Hoyo, A. Elliott, J. Sargatal, D. A. Christie, and E. de Juana, Editors). *Cornell Lab of Ornithology, Ithaca, NY, USA* (2020) doi:[10.2173/bow.goftyr1.01](https://doi.org/10.2173/bow.goftyr1.01).
14. Martínez, A. E. & Robinson, S. K. Using foraging ecology to elucidate the role of species interactions in two contrasting mixed-species flock systems in northeastern Peru. *Wilson J. Ornithol.* **128**, 378–390 (2016).
15. Willis, E. O. . The behavior of plain-brown woodcreepers, *Dendrocincla fuliginosa*. *Wilson Ornithol. Soc.* **84**, 377–420 (1972).
16. Boles, W. White-browed Fantail (*Rhipidura aureola*), version 1.0. In Birds of the World (J. del Hoyo, A. Elliott, J. Sargatal, D. A. Christie, and E. de Juana, Editors). *Cornell Lab of Ornithology, Ithaca, NY, USA* (2020) doi:[10.2173/bow.whbfan2.01](https://doi.org/10.2173/bow.whbfan2.01).

- 590 17. Boles, W. Willie-wagtail (*Rhipidura leucophrys*), version 1.0. In Birds of the World (J.  
591 del Hoyo, A. Elliott, J. Sargatal, D. A. Christie, and E. de Juana, Editors). *Cornell Lab of*  
592 *Ornithology, Ithaca, NY, USA* (2020) doi:10.2173/bow.wilwag1.01.
- 593 18. Moeliker, K. Blue-headed Crested-Flycatcher (*Trochocercus nitens*), version 1.0. In Birds  
594 of the World (J. del Hoyo, A. Elliott, J. Sargatal, D. A. Christie, and E. de Juana, Editors).  
595 *Cornell Lab of Ornithology, Ithaca, NY, USA* (2020) doi:10.2173/bow.bhcfly1.01.
- 596 19. Coates, B. J., Dutton, G. C. L. & Filardi, C. E. Family Monarchidae (Monarch-  
597 Flycatchers). in *Handbook of the birds of the world. Vol. 11. Old World Flycatchers to*  
598 *Old World Warblers. Barcelona: Lynx Editions.* (eds. del Hoyo, J., Elliott, A. & Christie,  
599 D. A. eds.) 244–329 (2006).
- 600 20. Boles, W. Yellow-bellied Fairy-Fantail (*Chelidorhynchus hypoxanthus*), version 1.0. In Birds  
601 of the World (J. del Hoyo, A. Elliott, J. Sargatal, D. A. Christie, and E. de Juana, Editors).  
602 *Cornell Lab of Ornithology, Ithaca, NY, USA* (2020) doi:10.2173/bow.yebfan1.01.
- 603 21. Clement, P. African Blue Flycatcher (*Elminia longicauda*), version 1.0. In Birds of the  
604 World (J. del Hoyo, A. Elliott, J. Sargatal, D. A. Christie, and E. de Juana, Editors).  
605 *Cornell Lab of Ornithology, Ithaca, NY, USA* (2020) doi:10.2173/bow.afbfly1.01.
- 606 22. Gosler, A. & Clement, P. Yellow-browed Tit (*Sylviparus modestus*), version 1.0. In Birds  
607 of the World (J. del Hoyo, A. Elliott, J. Sargatal, D. A. Christie, and E. de Juana, Editors).  
608 *Cornell Lab of Ornithology, Ithaca, NY, USA* (2020) doi:10.2173/bow.yebtit3.01.
- 609 23. Clement, P. Chestnut-capped Flycatcher (*Erythrocercus mccallii*), version 1.0. In Birds of  
610 the World (J. del Hoyo, A. Elliott, J. Sargatal, D. A. Christie, and E. de Juana, Editors).  
611 *Cornell Lab of Ornithology, Ithaca, NY, USA* (2020) doi:10.2173/bow.cheffy1.01.
- 612 24. Jablonski, P. G. Dark habitats and bright birds: warblers may use wing patches to flush  
613 prey. *Oikos* **75**, 350–352 (1996).
- 614 25. Marchetti, K. & Trevor, P. The adaptive significance of colour patterns in the old world  
615 leaf warblers, genus *Phylloscopus*. *OIKOS* **79**, 410–412 (1997).
- 616 26. Clement, P., J., Hoyo, D., Collar, N., Kirwan, G. M. & Christie, D. A. Common  
617 Chiffchaff (*Phylloscopus collybita*), version 1.0. In Birds of the World (S. M. Billerman,  
618 B. K. Keeney, P. G. Rodewald, and T. S. Schulenberg, Editors). *Cornell Lab of*  
619 *Ornithology, Ithaca, NY, USA* (2020) doi:10.2173/bow.comchi1.01.
- 620 27. Fishpool, L. & Tobias, J. A. Fischer’s Greenbul (*Phyllastrephus fischeri*), version 1.0. In  
621 Birds of the World (J. del Hoyo, A. Elliott, J. Sargatal, D. A. Christie, and E. de Juana,  
622 Editors). *Cornell Lab of Ornithology, Ithaca, NY, USA* (2020)  
623 doi:10.2173/bow.fisgre1.01.
- 624 28. Fishpool, L. & Tobias, J. A. Northern Brownbul (*Phyllastrephus strepitans*), version 1.0.  
625 In Birds of the World (J. del Hoyo, A. Elliott, J. Sargatal, D. A. Christie, and E. de Juana,  
626 Editors). *Cornell Lab of Ornithology, Ithaca, NY, USA* (2020)  
627 doi:10.2173/bow.norbro1.01.
- 628 29. Svensson, L. Upcher’s Warbler (*Hippolais languida*), version 1.0. In Birds of the World  
629 (J. del Hoyo, A. Elliott, J. Sargatal, D. A. Christie, and E. de Juana, Editors). *Cornell Lab*  
630 *of Ornithology, Ithaca, NY, USA* (2020) doi:10.2173/bow.upcwar1.01.
- 631 30. Ryan, P. Chestnut-throated Apalis (*Apalis porphyrolaema*), version 1.0. In Birds of the  
632 World (J. del Hoyo, A. Elliott, J. Sargatal, D. A. Christie, and E. de Juana, Editors).  
633 *Cornell Lab of Ornithology, Ithaca, NY, USA* (2020) doi:10.2173/bow.chtapa3.01.
- 634 31. Ryan, P. Black-collared Apalis (*Oreolais pulcher*), version 1.0. In Birds of the World (J.  
635 del Hoyo, A. Elliott, J. Sargatal, D. A. Christie, and E. de Juana, Editors). *Cornell Lab of*  
636 *Ornithology, Ithaca, NY, USA* (2020) doi:10.2173/bow.blcapa2.01.



- 637 32. Ryan, P. Cricket Longtail (*Spiloptila clamans*), version 1.0. In Birds of the World (J. del  
638 Hoyo, A. Elliott, J. Sargatal, D. A. Christie, and E. de Juana, Editors). *Cornell Lab of*  
639 *Ornithology, Ithaca, NY, USA* (2020) doi:doi.org/10.2173/bow.crilon1.01.
- 640 33. Madge, S. Common Tailorbird (*Orthotomus sutorius*), version 1.0. In Birds of the World  
641 (J. del Hoyo, A. Elliott, J. Sargatal, D. A. Christie, and E. de Juana, Editors). *Cornell Lab*  
642 *of Ornithology, Ithaca, NY, USA* (2020) doi:10.2173/bow.comtai1.01.
- 643 34. Kirwan, G. M., Collar, N., Robson, C. & Boesman, P. F. D. Scaly-breasted Cupwing  
644 (*Pnoepyga albiventer*), version 2.0. In Birds of the World (N. D. Sly, Editor). *Cornell Lab*  
645 *of Ornithology, Ithaca, NY, USA* (2022) doi:10.2173/bow.sbwbab1.02.
- 646 35. Harrap, S. Velvet-fronted Nuthatch (*Sitta frontalis*), version 1.0. In Birds of the World (J.  
647 del Hoyo, A. Elliott, J. Sargatal, D. A. Christie, and E. de Juana, Editors). *Cornell Lab of*  
648 *Ornithology, Ithaca, NY, USA* (2020) doi:10.2173/bow.vefnut1.01.
- 649 36. Kershner, E. L. & Ellison, W. G. Blue-gray Gnatcatcher (*Polioptila caerulea*), version  
650 1.0. In Birds of the World (A. F. Poole, Editor). *Cornell Lab of Ornithology, Ithaca, NY,*  
651 *USA* (2020) doi:10.2173/bow.buggna.01.
- 652 37. Hailman, J. P. A field study of the mockingbird's wing-flashing behavior and its  
653 association with foraging. *Wilson Ornithol. Soc.* **72**, 346–357 (1960).
- 654 38. Randler, C. Is tail wagging in white wagtails, *Motacilla alba*, an honest signal of  
655 vigilance? *Anim. Behav.* **71**, 1089–1093 (2006).
- 656 39. Mumme, R. L. Scare tactics in a neotropical warbler: White tail feathers enhance flush-  
657 pursuit foraging performance in the slate-throated redstart (*Myioborus miniatus*). *Auk* **119**,  
658 1024–1035 (2002).
- 659 40. Jablonski, P. G. & Lee, S. Painted redstarts (*Myioborus Pictus*) attack larger prey when  
660 using flush-pursue strategy. *Open Ornithol. J.* **11**, 34–38 (2018).
- 661 41. Jablonski, P. G. & McInerney, C. Prey escape direction is influenced by the pivoting  
662 displays of flush-pursuing birds. *Ethology* **111**, 381–396 (2005).
- 663 42. Jablonski, P. G. A rare predator exploits prey escape behavior: The role of tail-fanning  
664 and plumage contrast in foraging of the painted redstart (*Myioborus pictus*). *Behav. Ecol.*  
665 **10**, 7–14 (1999).
- 666 43. Hilbie, C. & Block, N. L. Collared Redstart (*Myioborus torquatus*), version 1.0. In Birds  
667 of the World (T. S. Schulenberg, Editor). *Cornell Lab Ornithol. Ithaca, NY, USA* (2020)  
668 doi:10.2173/bow.colred1.01.
- 669 44. Senter, P. & Robins, J. H. Range of motion in the forelimb of the theropod dinosaur  
670 *Acrocanthosaurus atokensis*, and implications for predatory behaviour. *J. Zool.* **266**, 307–  
671 318 (2005).
- 672 45. Senter, P. Comparison of forelimb function between *Deinonychus* and *Bambiraptor*  
673 (Theropoda: Dromaeosauridae). *J. Vertebr. Paleontol.* **26**, 897–906 (2006).
- 674 46. Senter, P. & Robins, J. H. Resting orientations of dinosaur scapulae and forelimbs: A  
675 numerical analysis, with implications for reconstructions and museum mounts. *PLoS One*  
676 **10**, 1–21 (2015).
- 677
